# Supplementary material for: It’s time for a minimum synoptic operation template in patients undergoing laparoscopic cholecystectomy: a systematic review
Source: PubMed Central journal article supplement (PMC8928637; doi:10.1186/s13017-022-00411-5), 2022-03-17
Supplement: 13017_2022_411_MOESM2_ESM.pdf [file 13017_2022_411_MOESM2_ESM.pdf]

# Compte Rendu Opérateur Cholécysectomie Laparoscopique

Nom du patient: \_\_\_\_\_ Date d'admission: \_\_\_\_\_ Hôpital: \_\_\_\_\_

Date: \_\_\_\_\_ Heure: \_\_\_\_\_

Age: \_\_\_\_\_ Chirurgien: \_\_\_\_\_

Sexe: \_\_\_\_\_ Assistants: \_\_\_\_\_

BMI: \_\_\_\_\_ Anesthésiste: \_\_\_\_\_

ASA Score: \_\_\_\_\_ IBODE: \_\_\_\_\_

**Détails de la procédure:** \*Insérez "O" = Oui, ou "N" = Non dans  et des valeurs numériques dans

Antibioprophylaxie  Type: \_\_\_\_\_ Moment de l'administration: \_\_\_\_\_

Indication chirurgicale: \_\_\_\_\_ Programmé  ou Urgence

Opération réalisée: \_\_\_\_\_

Abord: Laparoscopie  Conversion

Si conversion précisez les raisons pour convertir: \_\_\_\_\_

Insertion de trocars: Aiguille de Verres  Méthode semi-ouvert-"Hassan"

Trocart inséré sous contrôle visuel  Trocars: Nombre

Taille: ≤4mm  5mm  10-11mm  15mm

**Constatations Opératoires:** \_\_\_\_\_

Exploration de la cavité abdominale en dehors de la vésicule biliaire: Normale

Commentaires/Anomalies Organes Abdominaux: \_\_\_\_\_

Adhérences Intra-Abdominales: Aucune  HD  FID  Diffuses

## Vésicule biliaire:

Taille: Recroquevillée  Normale  Distendue

Adhérences à la paroi vésiculaire: Aucune  <50%  >50%  Accès complètement fermé

Possibilité d'attraper la VB sans vidange  VB vidangée

Mucocèle  Empyème  Fistule

# Compte Rendu Opérateur Cholécysectomie Laparoscopique

Epanchement  Epanchement seulement en HD  Epanchement péritonéal généralisé

Vue critique de sécurité identifiée  Photographiée  Filmée  Sulcus de Rouvière Identifié

Cholangiographie peropératoire: Non  Echoué  Normale  Calculs VBP  Anomalies VBP

**Exploration de la voie biliaire principale:** Transcystique  Cholédochotomie  Clairance Complète

CPRE peropératoire

Commentaires \_\_\_\_\_

**Problèmes/Complications:** Perforation VB  Calculs intrapéritonéaux  Calculs récupérés en totalité Oui Non

Blessure organes adjacents  Plaie Grêle  Plaie VBP  Plaie vasculaire  Pertes sanguines (ml)

Autre: \_\_\_\_\_ Prélèvements bactériologiques

## Type de Cholécystectomie Réalisée:

Totale  Sub-Totale  Antérograde  VB Laissée en Place

Si Sub-totale: Tous les calculs récupérés  Fermeture Infundibulaire  Fenestration

Lavage  VB extériorisée dans un sac

Fermeture pariétale: Fascia fermé sur trocars de: 3mm  5mm  10-11mm  15mm

Fils de Suture utilisés

Anesthésique local: Intrapéritonéal: \_\_\_\_\_ Pariétal: \_\_\_\_\_

Fermeture Cutanée Plan Sous-Cutané  Peau: Points  Agraffes  Colle

Score G10   Grade  Poids VB sans calculs (grammes)

**Consignes Postopératoires:** Perfusion intraveineuse 24heures: \_\_\_\_\_ Analgésie: \_\_\_\_\_

Autre: \_\_\_\_\_

Autres Commentaires: \_\_\_\_\_

**Signature du Chirurgien (Date & heure ):** \_\_\_\_\_
