# Supplementary material for: It’s time for a minimum synoptic operation template in patients undergoing laparoscopic cholecystectomy: a systematic review
Source: Springer Nature journal article supplement (doi:10.1186/s13017-022-00411-5), 2022-03-17
Supplement: MOESM1 [file 20228960]

# 腹腔镜胆囊切除术手术报告

病人姓名: \_\_\_\_\_ 入院日期: \_\_\_\_\_ 医院编号: \_\_\_\_\_

日期: \_\_\_\_\_ 时间: \_\_\_\_\_

年龄: \_\_\_\_\_ 外科医生: \_\_\_\_\_

性别: \_\_\_\_\_ 外科助理: \_\_\_\_\_

BMI: \_\_\_\_\_ 麻醉师: \_\_\_\_\_

ASA 分数: \_\_\_\_\_ 手术助理护士: \_\_\_\_\_

## 手术详情:

\*如果是, 请输入 "Y", 不是请输入 "N" 在 , 请输入数值在

预防性抗生素  药物: \_\_\_\_\_ 给药时间: \_\_\_\_\_

手术指征: \_\_\_\_\_ 择期  或 紧急

手术名称: \_\_\_\_\_

方法: 腹腔镜手术  腹腔镜转换开放手术

如果转换, 转换原因: \_\_\_\_\_

腹腔入口: Veress  Semi-Open-"Hassan"

直视端口  端口数:   
尺寸: ≤4mm  5mm  10-11mm  15mm

手术结果: \_\_\_\_\_

胆囊外的状态: 正常

其他观察或症状: \_\_\_\_\_

腹内粘连: 没  右季肋部  右髂窝  扩散粘连

## 胆囊调查结果:

大小: 干瘪  正常  膨胀

胆囊粘连: 没  <50%  >50%  隐藏

是否无需降压也能抓住胆囊  需降压胆囊

粘液腺囊肿  积脓  瘘管

# 腹腔镜胆囊切除术手术报告

自由流体  流体限制在右季肋部  腹部流体   
确认 Critical view of safety  照片  视频  确认 Rouviere 's Sulcus   
胆管造影: 没  尝试但失败  正常  胆总管结石  胆总管异常

## 胆总管探查:

跨囊  胆总管切开术  成功去除胆总管结石   
术中 内镜逆行胰胆管造影术   
评估 \_\_\_\_\_

问题/并发症: 胆囊穿孔  胆囊结石溢出  所有结石被取出   
器官损伤  肠损伤  胆总管损伤  血管损伤  失血量 (mls)   
其他: \_\_\_\_\_ 标本采集

## 胆囊切除术类型:

全胆囊  次全  眼底优先技术  胆囊没取出   
如果次全: 结石完全取出  Reconstituted  Fenestrated

灌洗  胆囊切除

## 伤口缝合闭方式:

筋膜缝合在 3mm 套管针端口  5mm  10-11mm  15mm

缝针材料: \_\_\_\_\_

局部麻醉: 腹腔  手术部位:

缝合伤口: 皮下  皮肤缝合  缝合夹  肤胶

G10 分数   级别  胆囊重量 (处于结石) (克数)

术后指示: 静脉输液 24 小时: \_\_\_\_\_ 止痛方式: \_\_\_\_\_

其他: \_\_\_\_\_

其他评论: \_\_\_\_\_

外科医生签证 (日期和时间): \_\_\_\_\_
