# Supplementary material for: It’s time for a minimum synoptic operation template in patients undergoing laparoscopic cholecystectomy: a systematic review
Source: Springer Nature journal article supplement (doi:10.1186/s13017-022-00411-5), 2022-03-17
Supplement: MOESM3 [file 20228960]

## تقرير جراحي لاستئصال المرارة بالمنظار

اسم المريض: \_\_\_\_\_ تاريخ الدخول: \_\_\_\_\_ رقم الملف الطبي: \_\_\_\_\_

التاريخ: \_\_\_\_\_ الوقت: \_\_\_\_\_

العمر: \_\_\_\_\_ الجراح: \_\_\_\_\_

الجنس: \_\_\_\_\_ المساعد: \_\_\_\_\_

مؤشر كتلة الجسم: \_\_\_\_\_ طبيب التخدير: \_\_\_\_\_

نقاط مقياس الجمعية الأمريكية للتخدير: \_\_\_\_\_ الممرض: \_\_\_\_\_

تفاصيل الاجراء الجراحي: أدخل "ن" = نعم، "ل" = لا في  وقيمة عددية في

مضادات حيوية وقائية  النوع: \_\_\_\_\_ وقت الإعطاء: \_\_\_\_\_

استطباب الجراحة: اختياري  أم طارئ

العملية المجراة: \_\_\_\_\_

أسلوب العملية: تنظيف  تحويل لفتح جراحي

إذا تم التحويل، سبب التحويل: \_\_\_\_\_

الدخول الصفاقي: فيريس  شبه مفتوح "هاسون"

تم إدخال المنفذ تحت الرؤية المباشرة  منافذ الدخول: العدد

المقاس:  $\geq 4$  مم  5 مم  10-11 مم  15 مم

الموجودات الجراحية العامة:

تنظير البطن العام خارج المرارة: طبيعي

ملاحظات/ الموجودات الأخرى في البطن: \_\_\_\_\_

الالتصاقات داخل البطن: لا يوجد  الربع العلوي الأيمن  الحفرة الحرقفية اليمنى  منتشرة

الموجودات المرارية:

الحجم: منكمشة  طبيعية  ممتددة

الالتصاقات على المرارة: لا يوجد   $> 50\%$    $< 50\%$   مدفونة

يمكن امسك المرارة دون تخفيف الضغط  تم تخفيف ضغط المرارة

قلة مخاطية  تقيح المرارة  ناسور

## تقرير جراحي لاستئصال المرارة بالمنظار

سائل حر  سائل في الربع العلوي الأيمن  سائل حر في البطن   
تم تحديد منظر الأمان بدقة  تم أخذ صورة ضوئية  تم تصويرها بالفيديو  تم تحديد تلم روفبير   
تصوير الأفتية الصفراوية أثناء العملية: لم يحاول  لم تنجح المحاولة  طبيعي  حصاة القناة الصفراوية المشتركة   
شدوذ في القناة الصفراوية المشتركة

استكشاف القناة الصفراوية المشتركة: عبر القناة المرارية  ببضع قناة الصفراء  تخليص ناجح   
تصوير البنكرياس والقنوات الصفراوية بالمنظار أثناء العملية

ملاحظة

المشاكل/المضاعفات: انتقاب المرارة  انسكاب الحساوي  تم استخراج جميع الحساوي نعم لا  
إصابة عضو  إصابة الأمعاء  إصابة القناة الصفراوية المشتركة  إصابة وعاء دموي  فقدان الدم (مل)   
أخرى:  ارسال مسحة الزراعة للمخبر

### نوع إجراء استئصال المرارة:

كلي  جزئي  القاع أولا  لم يتم إزالة المرارة   
إذا كان جزئياً: تم إزالة جميع الحصى  إعادة تكوين  تثقيب   
غسيل  ازيلت المرارة داخل كيس   
إغلاق الجرح: تم إغلاق الصفاق على منافذ 3 مم  5 مم  10-11 مم  15 مم   
مواد خياطة

مخدر موضعي: داخل جوف البطن: \_\_\_\_\_ الجرح: \_\_\_\_\_

إغلاق الجلد: تحت الجلد  غرزة الجلد  دبابيس  غراء

نقاط G10  الدرجة  وزن المرارة بدون حصوات (جرام)

تعليمات ما بعد الجراحة: محاليل وريدية ل 24 ساعة: \_\_\_\_\_ مسكنات: \_\_\_\_\_

أخرى: \_\_\_\_\_

ملاحظات أخرى: \_\_\_\_\_

توقيع الجراح (تاريخ ووقت التوقيع): \_\_\_\_\_
